# Supplementary figures and images for: Silencing of Smed -β catenin1 generates radial-like hypercephalized planarians
Source: Oxford University Press journal article supplement (doi:10.1242/dev.020289), 2008-02-20

# Smed-bcat1

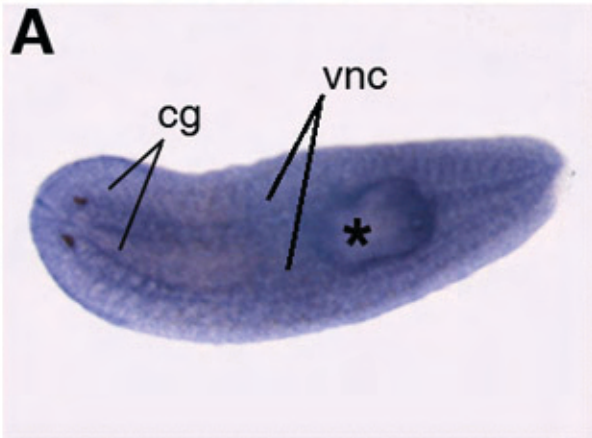

# Smed-bcat2

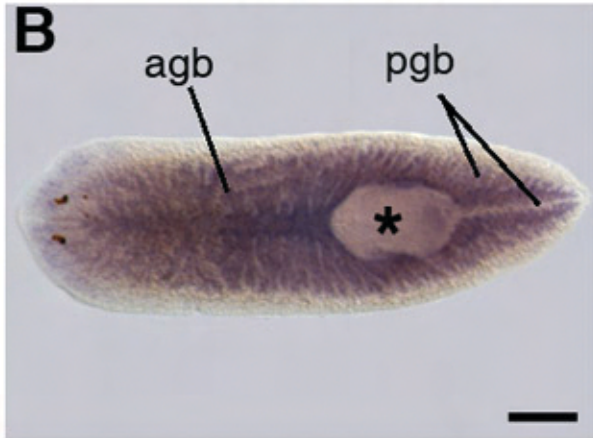

Supplement: dev020289-sup-020289-figs1.pdf [file dev020289-sup-020289-figs1.pdf]

1dR

2,5dR

6dR

11dR

Smed-bcat1  
Smed-bcat2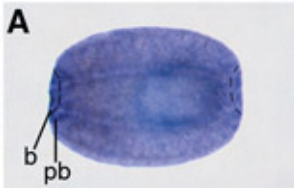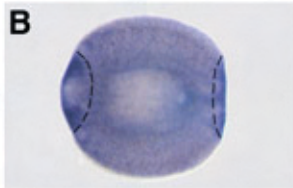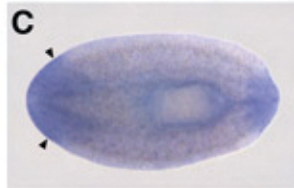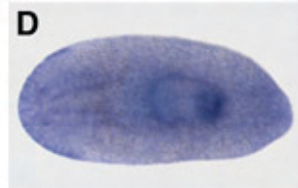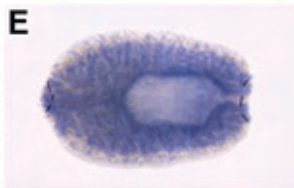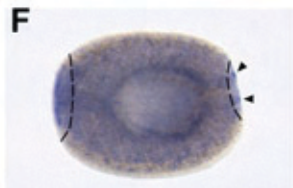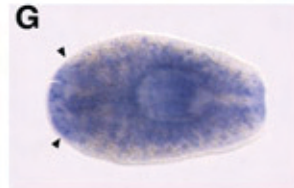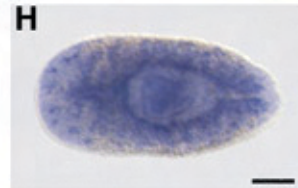

Supplement: dev020289-sup-020289-figs2.pdf [file dev020289-sup-020289-figs2.pdf]

Control

Smed-bcat1(-)

Smed-bcat1

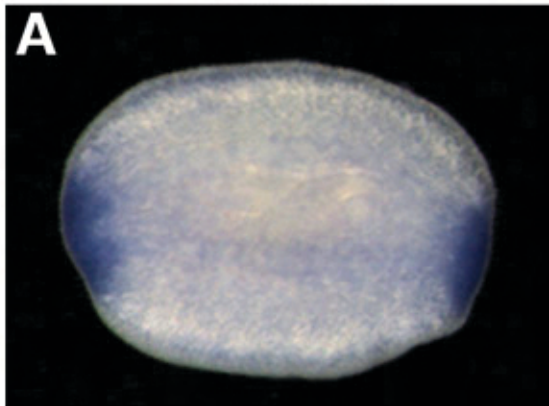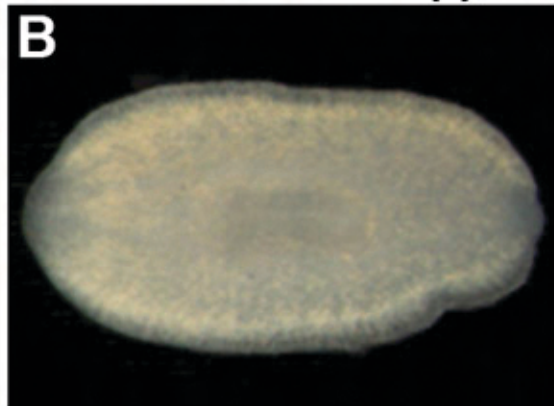

Control

Smed-bcat2(-)

Smed-bcat2

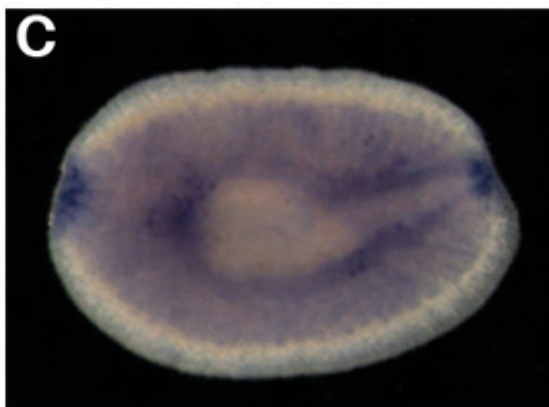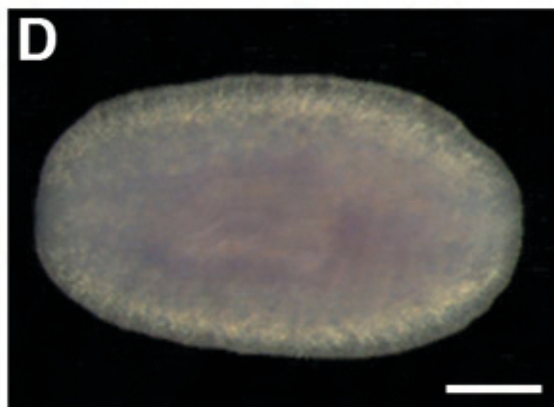

Supplement: dev020289-sup-020289-figs3.pdf [file dev020289-sup-020289-figs3.pdf]

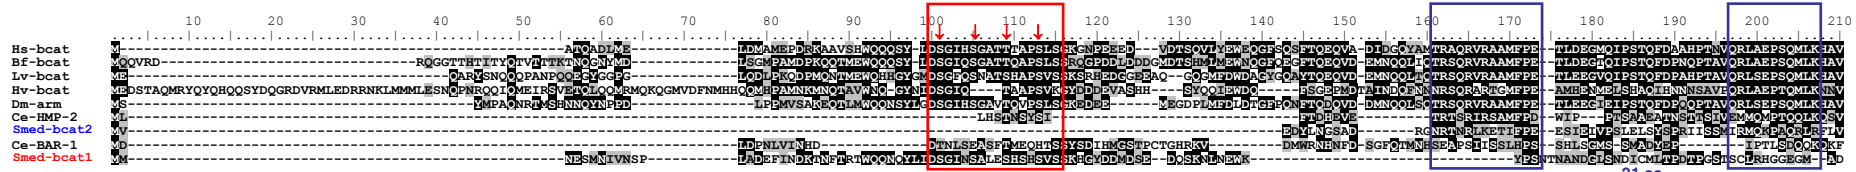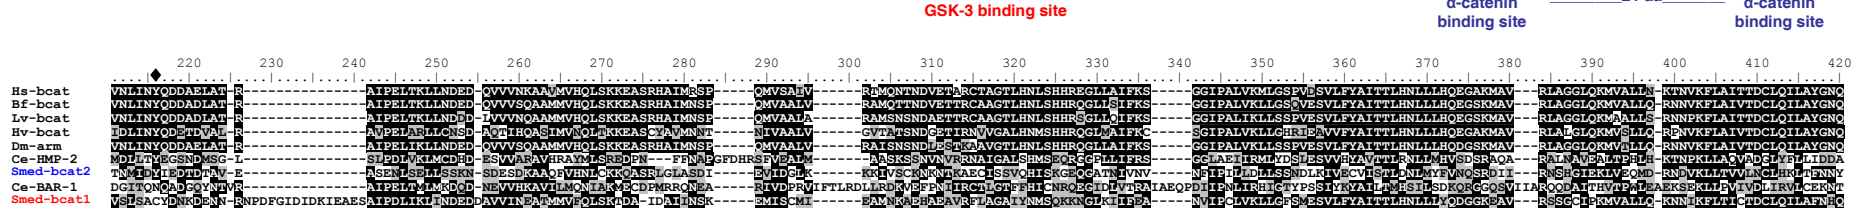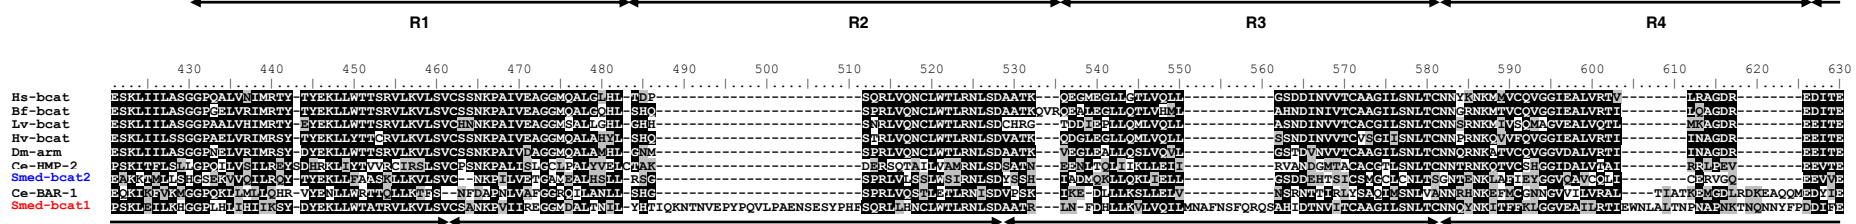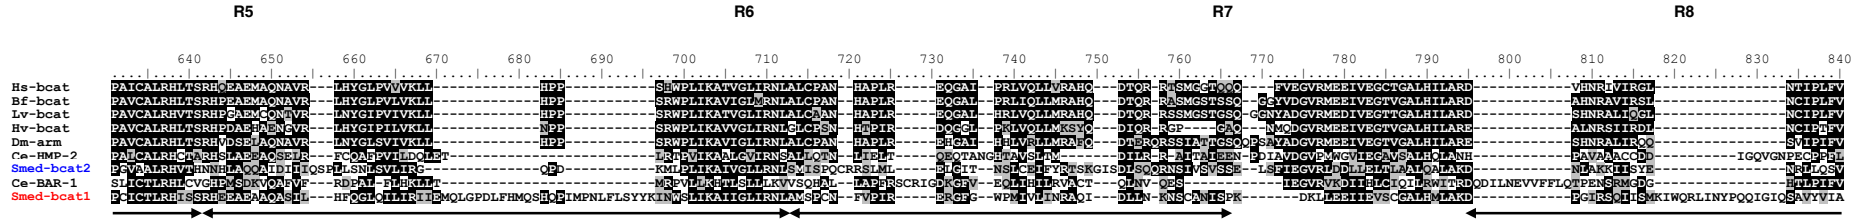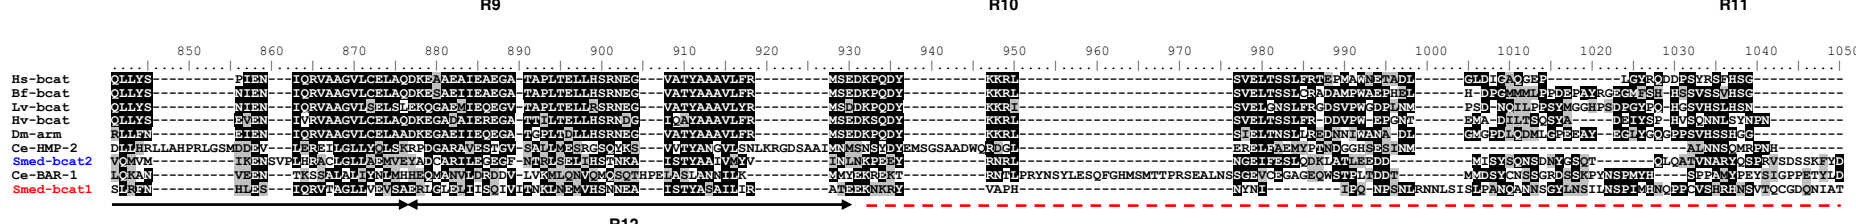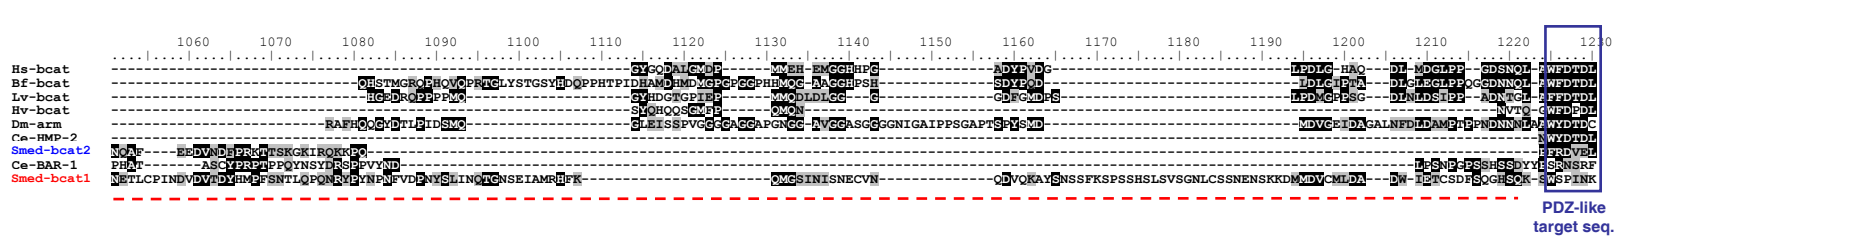

Supplement: dev020289-sup-020289-figs4.pdf [file dev020289-sup-020289-figs4.pdf]

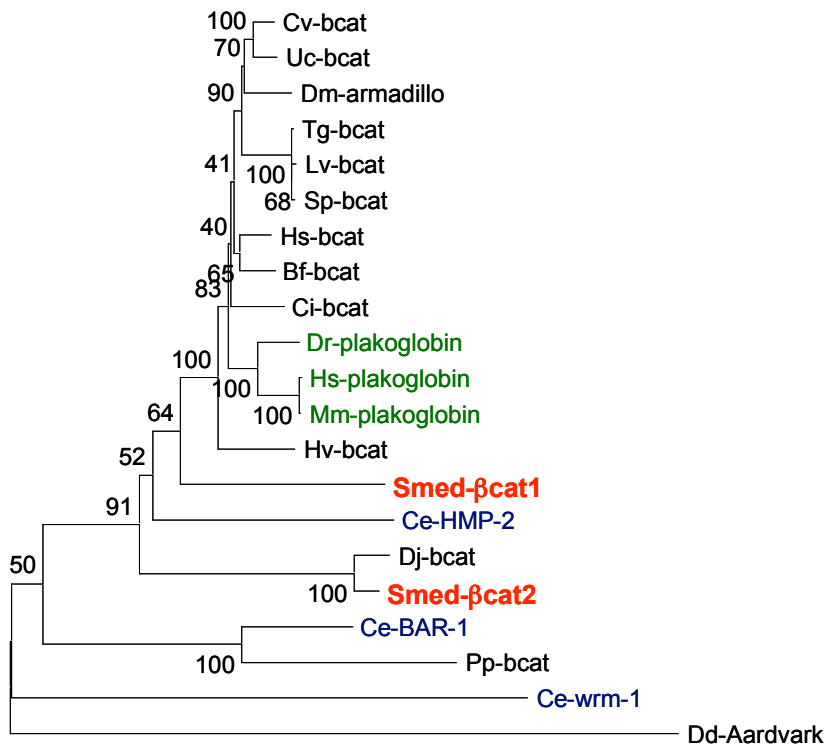

Supplement: dev020289-sup-020289-figs5.pdf [file dev020289-sup-020289-figs5.pdf]
